# Supplementary material for: A Brain-Protective Sterol from Soft Coral Inhibits Lipopolysaccharide-Induced Matrix Metalloproteinase-9-Mediated Astrocytic Migration
Source: MDPI journal article supplement (doi:10.3390/biomedicines12010226), 2024-01-19
Supplement: s1 [file s1]

## Supplementary information

### Method

#### *Molecular Docking*

The molecular docking software used here was Discovery Studio 2021 Client. The preparation process of the target protein as follows: The crystal structure of the target proteins of ERK1/2 (PDB ID: 6G9M) and STAT3 (PDB ID: 6NJS) were downloaded from the PROTEIN DATA BANK (<https://www.rcsb.org/>). The grid boxes after identifying the binding site of the protein and its residues were created. We visualized and analyzed the ligand-protein complexes and used the LibDock scores to predict binding affinities between 4p3f and target proteins, ERK1/2 and STAT3.

### Result

Here, we further explored the interaction modes between 4p3f and ERK1/2 or STAT3 protein by DS molecular docking. The molecular docking data indicated that 4p3f can interact with the key protein of ERK (Figure S1A), suggesting that 4p3f could inhibit LPS-induced MMP-9-mediated event (cell migration) in RBA via blocking ERK-dependent pathway. Moreover, the molecular docking data also indicated that 4p3f can interact with the key protein of STAT3 (Figure S1B), suggesting that 4p3f can affect STAT3-mediated signaling pathway.

**A.**

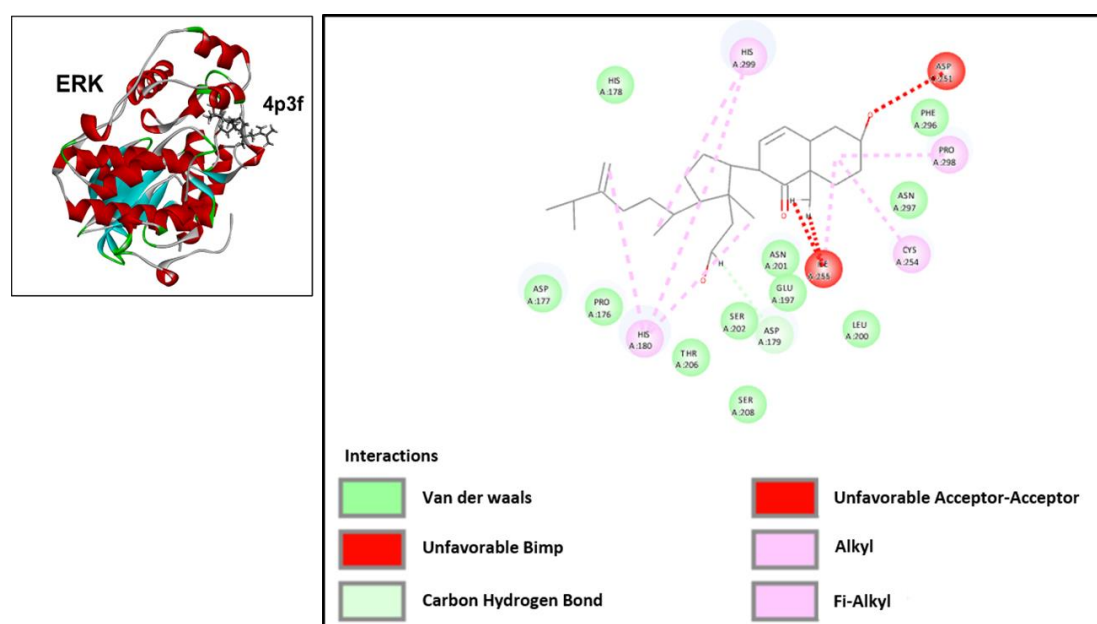

**B.**

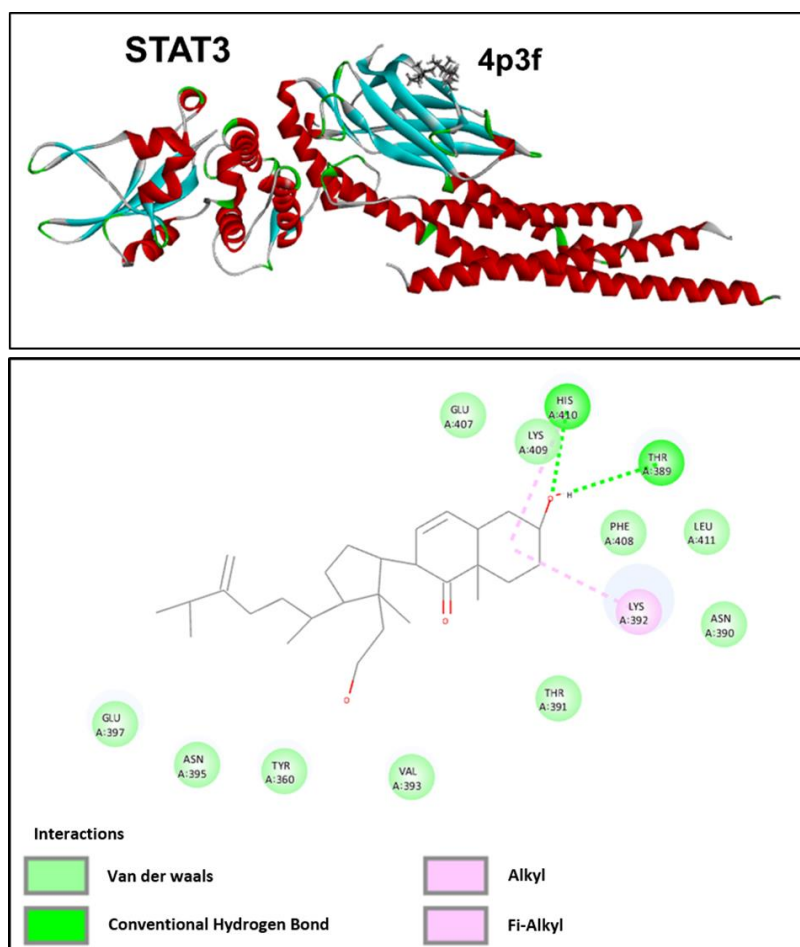

**Figure S1.** Molecular docking about 4p3f and the proteins of ERK1/2 (A) or STAT3 (B). Two-dimensional binding modes and three-dimensional H-binding modes showing the interactions between 4p3f and ERK1/2 or STAT3 protein.
